# Supplementary material for: The Effect of the Evaluation of Trash Can Removal Policy under the “Compulsory Times” of Waste-Sorting in Longhua District in China
Source: MDPI journal article supplement (doi:10.3390/su15129763), 2023-06-19
Supplement: s1 [file s1]

# Questionnaire survey on satisfaction of garbage classification in Longhua

## District in Shenzhen

1. What is the total responsible unit of garbage classification in Shenzhen? (If not clear, please write "1")

\_\_\_\_\_

2. What is the situation of floor bucket removal in your district?

- ☐ The barrel has been removed
- ☐ Not removed the barrel

3. Which mode does 'bucket removal' belong to Shenzhen garbage classification?

- ☐ 1.0 mode
- ☐ 2.0 mode
- ☐ 3.0 mode
- ☐ 4.0 mode
- ☐ Other \_\_\_\_\_
- ☐ Not clear

4. Understand Shenzhen garbage classification policy clearly:

- ☐ Very disagree
- ☐ Relatively disagree
- ☐ Generally
- ☐ Relatively agree
- ☐ Very agree

5. The publicity and education activities of the residential garbage classification policy:

- ☐ Very dissatisfied
- ☐ Not satisfied
- ☐ Generally
- ☐ Satisfied
- ☐ Very satisfied

6. Where do you usually get information about waste separation policy?

- ☐ Social media such as public websites/blogs
- ☐ Traditional media such as newspapers, magazines, TV and radio
- ☐ Community bulletin boards
- ☐ Government official website
- ☐ Volunteers/property owners' door-to-door promotion
- ☐ School education
- ☐ Other \_\_\_\_\_

7. Participate in public publicity and education activities on waste separation frequently.

- ☐ Very disagree
- ☐ Relatively disagree
- ☐ Generally
- ☐ Relatively agree
- ☐ Very agree

8. You will actively share or recommend the waste separation publicity and education activities to your friends and relatives.

- ☐ Very disagree
- ☐ Relatively disagree
- ☐ Generally
- ☐ Relatively agree
- ☐ Very agree

9. How do you feel about the existing ways of participating in the formulation of garbage classification policy: (Tip: the ways of residents' participation include: democratic review meeting, hearing, and the collection of opinions from the relevant persons in charge of the district, etc.)

- ☐ Very dissatisfied
- ☐ Not satisfied
- ☐ Generally
- ☐ Satisfied
- ☐ Very satisfied

10. How do you feel about the implementation of the waste separation policy (the implementation methods include economic means (bonus and fine), educational means (publicity and education), administrative means (enforcement and legal means):

- ☐ Very dissatisfied
- ☐ Not satisfied
- ☐ Generally
- ☐ Satisfied
- ☐ Very satisfied

11. The existing waste separation policy meets your daily needs.

- ☐ Very disagree
- ☐ Relatively disagree
- ☐ Generally
- ☐ Relatively agree
- ☐ Very agree

12. The existing waste separation policy meets the sustainable development needs of the society.

- ☐ Very disagree
- ☐ Relatively disagree
- ☐ Generally
- ☐ Relatively agree
- ☐ Very agree

13. The waste separation policy is constantly developing and improving.

- ☐ Very disagree
- ☐ Relatively disagree
- ☐ Generally
- ☐ Relatively agree
- ☐ Very agree

14. The information of the existing waste separation policy is open and transparent.

- ☐ Very disagree
- ☐ Relatively disagree
- ☐ Generally
- ☐ Relatively agree
- ☐ Very agree

15. The information of the waste separation policy is comprehensive.

- ☐ Very disagree
- ☐ Relatively disagree
- ☐ Generally
- ☐ Relatively agree
- ☐ Very agree

16. Satisfied with the degree of legalization (i.e., policy legislation) of the existing waste separation policy.

- ☐ Very disagree
- ☐ Relatively disagree
- ☐ Generally
- ☐ Relatively agree
- ☐ Very agree

17. Effectiveness of the implementation of waste separation:

- ☐ Very dissatisfied
- ☐ Not satisfied
- ☐ Generally
- ☐ Satisfied
- ☐ Very satisfied

18. Government's attention to waste separation:

- ☐ Very dissatisfied

- ☐ Not satisfied
- ☐ Generally
- ☐ Satisfied
- ☐ Very satisfied

19. The enforcement of waste separation by properties:

- ☐ Very dissatisfied
- ☐ Not satisfied
- ☐ Generally
- ☐ Satisfied
- ☐ Very satisfied

20. The amount of work that properties put into waste separation:

(1) In terms of personnel

- ☐ Very dissatisfied
- ☐ Not satisfied
- ☐ Generally
- ☐ Satisfied
- ☐ Very satisfied

(2) In terms of supporting facilities (sorted garbage cans, plastic bags, etc.)

- ☐ Very dissatisfied
- ☐ Not satisfied
- ☐ Generally
- ☐ Satisfied
- ☐ Very satisfied

21. How do you feel about the workload invested by the government in waste separation (including: incentive bonus, supervisors, sorting bins, promotion materials, etc.):

- ☐ Very dissatisfied
- ☐ Not satisfied
- ☐ Generally
- ☐ Satisfied
- ☐ Very satisfied

22. The frequency of your participation in waste separation:

- ☐ Always
- ☐ Often
- ☐ Occasionally
- ☐ Never

23. Attitude of participating in waste separation is proactive.

- ☐ Very disagree
- ☐ Relatively disagree

- ☐ Generally
- ☐ Relatively agree
- ☐ Very agree

24. Be clear about the waste categories to which various kinds of domestic waste belong.

- ☐ Very disagree
- ☐ Relatively disagree
- ☐ Generally
- ☐ Relatively agree
- ☐ Very agree

25. The supervisors (volunteers) in your community have a supervisory role to guide you.

- ☐ Very disagree
- ☐ Relatively disagree
- ☐ Generally
- ☐ Relatively agree
- ☐ Very agree

26. The enforcement and supervision system of waste separation is effective.

- ☐ Very disagree
- ☐ Relatively disagree
- ☐ Generally
- ☐ Relatively agree
- ☐ Very agree

27. The system of reward and punishment for waste separation can promote your participation in waste separation.

- ☐ Very disagree
- ☐ Relatively disagree
- ☐ Generally
- ☐ Relatively agree
- ☐ Very agree

28. The name of your neighborhood is (information is for research purposes only and will never be leaked)

---

29. Your gender:

- ☐ Male
- ☐ Female

30. Your age:

- ☐ Below 18 years old

- ☐ 18~25 years old
- ☐ 26~30 years old
- ☐ 31~40 years old
- ☐ 41~50 years old
- ☐ 51~60 years old
- ☐ 60 years old

31. Your academic career:

- ☐ High school and below
- ☐ Bachelor's degree
- ☐ Master or above

32. How many years have you lived in this community:

---

25. Do you have anything else further to say about the waste separation policy?

---
