# Supplementary material for: The Effect of the Evaluation of Trash Can Removal Policy under the “Compulsory Times” of Waste-Sorting in Longhua District in China
Source: MDPI journal article supplement (doi:10.3390/su15129763), 2023-06-19
Supplement: s1 [file s1]

Archive with 1 entries (1 files):
- sustainability-2391877-supplementary.pdf
